# Supplementary material
Source: publisher figshare collection journal article supplement (https://frontiersin.figshare.com/ndownloader/files/12568322)
Supplement: Supplementary file [file 12568322]

# Supporting Information

A novel qPCR method for simultaneous detection and quantification of viable pathogenic and non-pathogenic *Vibrio parahaemolyticus* (*tlh*<sup>+</sup>, *tdh*<sup>+</sup>, *ureR*<sup>+</sup>)

Ben Niu,<sup>1†</sup> Bin Hong,<sup>1†</sup> Zhaohuan Zhang<sup>1†</sup>, Lili Mu<sup>a</sup>, Haiquan Liu<sup>1,2,3,4</sup>

Yingjie Pan<sup>1,2,3</sup>, YongZhao<sup>1,2,3\*</sup>

<sup>1</sup> College of Food Science and Technology, Shanghai Ocean University, 999# Hu Cheng Huan Road, Shanghai, 201306, China

<sup>2</sup> Laboratory of Quality & Safety Risk Assessment for Aquatic Products on Storage and Preservation (Shanghai), Ministry of Agriculture, 999# Hu Cheng Huan Road, Shanghai, 201306, China

<sup>3</sup> Shanghai Engineering Research Center of Aquatic-Product Processing & Preservation, 999# Hu Cheng Huan Road, Shanghai, 201306, China

<sup>4</sup> Engineering Research Center of Food Thermal-processing Technology, Shanghai Ocean University, Shanghai 201306, China

Table S1 The gene information (*tlh*, *tdh*, and *trh*) of clinical *Vibrio parahaemolyticus*.

| Strains Name | <i>tlh</i> <sup>+</sup> | <i>tdh</i> <sup>+</sup> | <i>trh</i> <sup>+</sup> |
|--------------|-------------------------|-------------------------|-------------------------|
| V. pc1       | +                       | +                       | -                       |
| V. pc2       | +                       | +                       | -                       |
| V. pc15      | +                       | +                       | -                       |
| V. pc16      | +                       | +                       | -                       |
| V. pc17      | +                       | +                       | -                       |
| V. pc18      | +                       | -                       | +                       |
| V. pc19      | +                       | +                       | -                       |
| V. pc20      | +                       | +                       | -                       |
| V. pc21      | +                       | +                       | -                       |
| V. pc22      | +                       | +                       | -                       |
| V. pc25      | +                       | +                       | -                       |
| V. pc26      | +                       | +                       | -                       |
| V. pc27      | +                       | +                       | -                       |
| V. pc28      | +                       | +                       | -                       |
| V. pc29      | +                       | +                       | -                       |
| V. pc32      | +                       | +                       | -                       |
| V. pc33      | +                       | +                       | -                       |
| V. pc34      | +                       | +                       | -                       |
| V. pc35      | +                       | +                       | -                       |
| V. pc36      | +                       | -                       | +                       |
| V. pc37      | +                       | +                       | -                       |
| V. pc38      | +                       | +                       | -                       |
| V. pc40      | +                       | +                       | -                       |
| V. pc41      | +                       | +                       | -                       |
| V. pc42      | +                       | +                       | -                       |
| V. pc43      | +                       | +                       | +                       |
| V. pc44      | +                       | -                       | -                       |
| V. pc45      | +                       | +                       | -                       |
| V. pc46      | +                       | +                       | -                       |
| V. pc47      | +                       | +                       | -                       |
| V. pc48      | +                       | +                       | -                       |
| V. pc49      | +                       | +                       | +                       |
| V. pc50      | +                       | +                       | -                       |
| V. pc51      | +                       | +                       | -                       |
| V. pc54      | +                       | +                       | +                       |
| V. pc55      | +                       | +                       | -                       |
| V. pc85      | +                       | -                       | +                       |
| V. pc89      | +                       | +                       | -                       |
| V. pc90      | +                       | +                       | -                       |
| V. pc94      | +                       | -                       | +                       |
| V. pc97      | +                       | +                       | -                       |
| V. pc100     | +                       | +                       | -                       |

Table S2 Comparison of qPCR, RNA-qPCR and Plate counting assays with the developed novel qPCR

| Name           | mechanism            | Time    | Labor    | Accuracy | DOL                     | Throughput | Cost | Remarks                                          |
|----------------|----------------------|---------|----------|----------|-------------------------|------------|------|--------------------------------------------------|
| Plate counting | Colony-Forming Units | 4-5 day | High     | Low      | 10 CFU/100mL            | Low        | Low  | False-negative results in case of VBNC cell.     |
| qPCR           | DNA amplification    | ~4 h    | Moderate | Moderate | 10 <sup>2</sup> cell/mL | High       | High | No discrimination between dead and viable cells. |
| RNA-qPCR       | DNA amplification    | >4 h    | Moderate | Moderate | 10 <sup>2</sup> cell/mL | High       | High | Difficulty on RNA extraction                     |
| novel-qPCR     | DNA amplification    | ~4 h    | Moderate | High     | 10 <sup>2</sup> cell/mL | High       | High | No                                               |

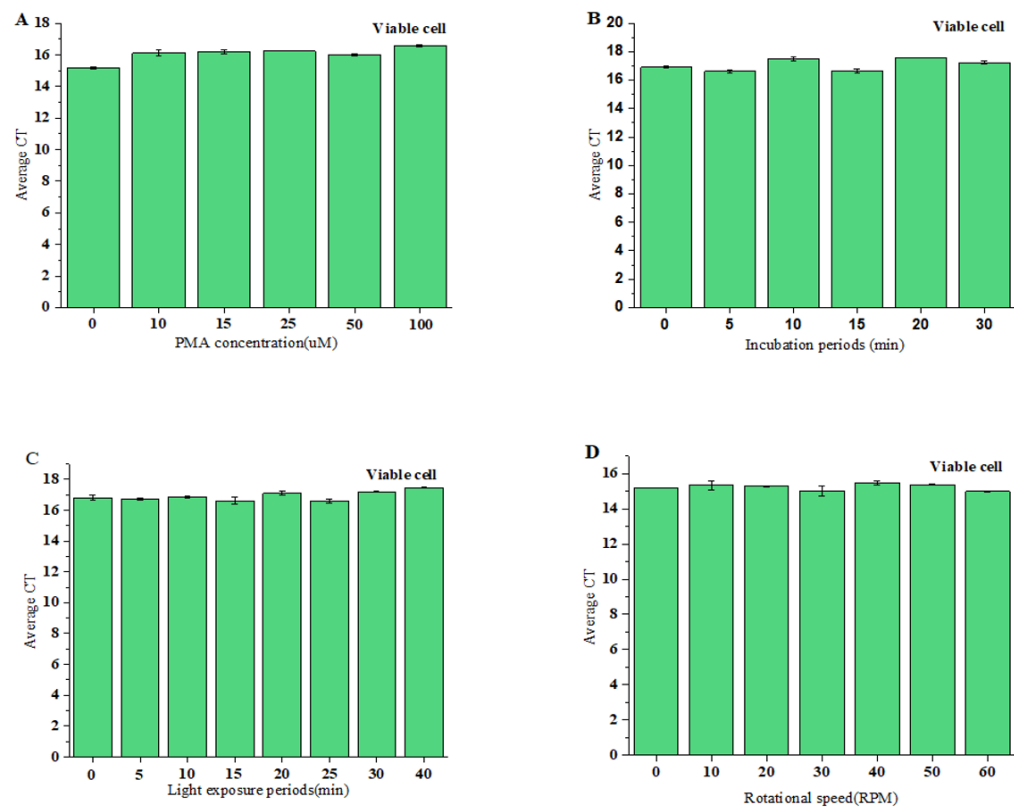

Fig. S1 PMA pretreatment on viable cell: concentration (A), incubation time (B), light exposure (C), and rotation rate (D).

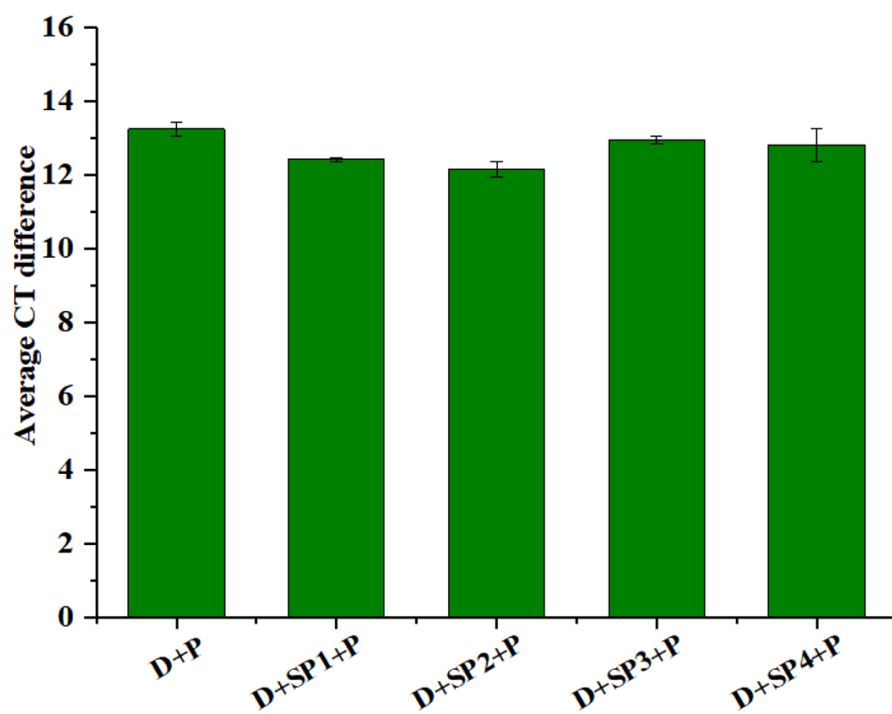

Fig. S2 The novel qPCR inhibition of practical sample. (D: dead cell, P: PMA, SP1: shrimp, SP2: calm, SP3: water collected from shrimp bucket, SP4: water collected from calm bucket)
